# Supplementary material
Source: PubMed Central journal article supplement (PMC7097986)
Supplement: Supp._Files.pdf [file Supp._Files.pdf]

## **Supplemental information**

### **Extended Experimental Methods**

#### *Human IVD tissue*

Research involving human material was performed in accordance with the Declaration of Helsinki. Human IVD tissue from idiopathic scoliosis patients was obtained as surplus material from scoliosis correction surgery (approval ID MEC 08-4-021). Immortalization and cloning procedures of NP and AF cells have been extensively described before (1, 2). Adult human IVD tissue was obtained from a 63 years old, non-heart beating donor (3): two IVDs L1/L2 (without overt signs of degeneration; healthy) and L4/L5 (clearly degenerated; *cf.* Figure 1C, D) were dissected by an orthopedic surgeon. Approval for all experimental sections of the current study and informed consent for publication of patient details and accompanying images in this manuscript was obtained as an integral part of the MUMC-Medical Ethical Review Committee (METC approval 08-4-021; July 11, 2012); the approval is held by the authors (LWvR) and is available for review by the Editor-in-Chief. Macroscopic pictures of tissues from L1/L2 and L4/L5 IVDs were captured with an Olympus Zuiko mirror reflex camera. Tissue was dissected; fixed in formalin, paraffin embedded and 5  $\mu\text{m}$  sections were stained with Safranin O/Hematox according to standard protocols (4). Microscopic images were captured using a NIKON TE200 Eclipse microscope and photographed using a NIKON DXM1200 digital camera.

#### *Cell culture*

The original isolation of primary NP and AF material from young donors (age 8-15 years), the immortalization of NP and AF cells and the establishment and characterization of

immortal NP and AF cell lines have been described in detail elsewhere (1). NP and AF cell clones were standardly cultured in DMEM-F12/Glutamax (Gibco), 10% fetal calf serum (FCS; Biowhittaker, cat no DE14-801F), 1% penicillin/streptomycin (Gibco), 1% non-essential amino acids (NEAA; Gibco). All cell clones used for expression array analysis were derived from one donor (D5; 13 years old, male *spina bifida* patient; IVD levels T6-L1) (1, 2). For array expression analyses 4 independent cell clones representing different clonal phenotypes (*cf.* Figure 2B) were cultured on 158 cm<sup>2</sup> culture dishes (Greiner) and harvested during the exponential growth phase at 48 hours post-plating, at approximately 30-40% confluency, under standard culturing conditions (Supplementary Figure 1A). Samples were harvested and processed for RNA isolation and subsequent whole transcriptome analysis or cDNA synthesis for quantitative PCR.

#### *RNA isolation and quantitative PCR*

RNA was isolated according to manufacturer's instructions with the RNeasy kit (QIAGEN). Total RNA (500ng) for each sample was converted into first strand cDNA with the iScript cDNA synthesis kit (Bio-Rad, USA) according to manufacturer's instructions. Gene expression was determined using Real-time quantitative PCR (RT-qPCR) with SYBR<sup>®</sup> Green (Eurogentec). Primer sets were validated and are depicted in Table 7. For amplification, an Applied Biosystems ABI PRISM 7700 Sequence Detection System was used: initial denaturation 95°C for 10 min was followed by 40 cycles of DNA amplification. Data was analyzed using the standard curve method and normalized to *Cyclophillin A*. Statistical significance ( $p < 0.05$ ) was determined by two-tailed Student's *t*-test.

#### *Whole transcriptome expression datasets*

Raw data from published whole transcriptome expression measurements of primary human AF, NP and AC cells from 3 different donors per tissue (n=9 in total), was provided by Prof. J.H. Hoyland and Dr. S.M. Richardson (Manchester, UK). Briefly, high-quality RNA with an RNA integrity number of at least 7 taken from 3 histologically “normal” IVD samples (2 male and 1 female donor, ages 46–57 years [mean age 51 years]; histologic grade 1 or 2) and articular cartilage samples (1 male and 2 female donors, ages 55–60 years [mean age 58 years]; Mankin grade 1 or 2) were used for the microarray analyses (5). The calculated mean age of all six AF and NP was 55 years.

Immortal cell clone RNA samples were processed for quality control, labeling, hybridization and data extraction at Service XS B.V. (Leiden, the Netherlands). The RNA integrity and concentration was determined using lab-on-chip analysis on the Agilent 2100 Bioanalyzer (Agilent Technologies, Inc., Santa Clara, CA, USA). Biotinylated cRNA was prepared using the illumine TotalPrep RNA Amplification Kit (Ambion, Inc., Austin, TX, USA) according to manufacturer’s specifications with an input of 200 ng total RNA. Representative, high-quality RNA preparations from triplicate samples for each of the 12 distinct immortal cell clones, were characterized using 12 arrays (*cf.* Figure 2B). Per clone, 750 ng of the obtained biotinylated cRNA samples was hybridized onto the Illumina humanHT-12v4 (Illumina, Inc., San Diego, CA, USA). Hybridization and washing were performed according to the Illumina manual “Direct hybridization assay guide”. Scanning was performed on the Illumina iScan (Illumina, Inc., San Diego, CA, USA). Image analysis and extraction of raw expression data was performed with Illumina GenomeStudio v2011.1 gene expression software with default settings (no background correction and no normalization).

The immortal cell clone NP-R, NP-nR and AF array dataset and primary NP, AF, AC dataset were analyzed using the open source scripting language R (version 2.13.0) and R packages of Bioconductor 2.8. Established quality control, visualization, normalization and statistical methods were combined in the workflow using the pipeline from ArrayAnalysis.org (6).

The limma package (7) was used to apply linear regression modelling with modified t-tests to evaluate statistically significant differences between groups: primary NP to AC, NP to AF and immortal NP-R to NP-nR, NP-R to AF, NP-nR to AF (Benjamini Hochberg FDR adjusted p value  $<0.05$  was considered significant). For the comparison of AF-S and AF-nS cell clones the regular p value  $<0.05$  was used. Additional criteria were used to identify relevant expression differences in a more stringent procedure: fold change larger than 2.0 and an average expression value of 100 or higher (mean fluorescence intensity) in the cell type of interest.

To enable principle component analysis (PCA) using datasets derived from distinct microarray platforms, comparison of immortal cell clone and primary cell datasets generated on Affymetrix and Illumina platforms, respectively, was done by ranking genes by descending expression value and assigning an ordinal number reflecting their relative position within each dataset.

Network analyses were performed using Cytoscape and the GeneMANIA plugin (8, 9). Membrane expressed genes, as determined by meta-analyses (10), and were coupled to our whole transcriptome datasets in R based on Entrez Gene ID resulting in a list of 6,134 matched membrane expressed genes.

## Supplemental References

1. van den Akker GG, Surtel DAM, Cremers A, Rodrigues-Pinto R, Richardson SM, et al. Novel immortal human cell lines reveal subpopulations in the nucleus pulposus. *Arthritis Research & Therapy*. 2014;16:R135-R35
2. van den Akker GG, Surtel DA, Cremers A, Richardson SM, Hoyland JA, et al. Novel Immortal Cell Lines Support Cellular Heterogeneity in the Human Annulus Fibrosus. *PLoS ONE*. 2016;11:e0144497
3. van den Akker GG, Surtel DA, Cremers A, Hoes MF, Caron MM, et al. EGR1 controls divergent cellular responses of distinctive nucleus pulposus cell types. *BMC Musculoskelet Disord*. 2016;17:124
4. Welting T, Caron M, Emans P, Janssen M, Sanen K, et al. Inhibition of cyclooxygenase-2 impacts chondrocyte hypertrophic differentiation during endochondral ossification. *eCM*. 2011;22:420-37
5. Minogue BM, Richardson SM, Zeef LAH, Freemont AJ, Hoyland JA. Characterization of the human nucleus pulposus cell phenotype and evaluation of novel marker gene expression to define adult stem cell differentiation. *Arthritis & Rheumatism*. 2010a;62:3695-705
6. Eijssen LM, Jaillard M, Adriaens ME, Gaj S, de Groot PJ, et al. User-friendly solutions for microarray quality control and pre-processing on ArrayAnalysis.org. *Nucleic acids research*. 2013;41:W71-6
7. Ritchie ME, Phipson B, Wu D, Hu Y, Law CW, et al. limma powers differential expression analyses for RNA-sequencing and microarray studies. *Nucleic Acids Research*. 2015;43:e47-e47
8. Montojo J, Zuberi K, Rodriguez H, Kazi F, Wright G, et al. GeneMANIA Cytoscape plugin: fast gene function predictions on the desktop. *Bioinformatics*. 2010;26:2927-28
9. Lopes CT, Franz M, Kazi F, Donaldson SL, Morris Q, Bader GD. Cytoscape Web: an interactive web-based network browser. *Bioinformatics*. 2010;26:2347-8
10. Uva P, Lahm A, Sbardellati A, Grigoriadis A, Tutt A, de Rinaldis E. Comparative Membranome Expression Analysis in Primary Tumors and Derived Cell Lines. *PLoS ONE*. 2010;5:e11742

## Supplemental Figure legends

**Figure S1: Morphological characteristics of immortalized cell clones.** A) Phase contrast images of NP-R, NP-nR and AF exponentially growing cell cultures prior to RNA isolation; bar represents 20 micron. B) Gene expression analysis of *FOXF1*, *CA12*, *COL12A1*, *SFRP2* and *CD24* in indicated cell clones (n=3 biological repeats per clone). Consistent with earlier observations, *FOXF1* and *CA12* expression was highest in NP-R clones, while *CD24* mRNA levels were highest in NP-nR clones (9). *SFRP2* was strongly expressed in AF and NP-nR clones and was nearly undetectable in NP-R clones. *COL12A1* was significantly higher expressed in both AF and NP-nR clones compared to NP-R clones. Single dots represent a single measurement; horizontal lines represent the mean of all measurements. Correspondence of symbols to clone identity is indicated in the table (bottom right). Gene expression was normalized to *Cyclophilin A*. Statistical significant differences are indicated by an asterisk (two-tailed Student's *t*-test; p value <0.05).

**Figure S2: Principle component analysis clusters immortalized NP and AF clones.** A) PCA plot of immortalized NP-Responder (n=4; red square symbols), NP non-Responder (n=4; blue square symbols) and AF (n=4; green triangular symbols) cell clones. NP-nR clone 102 was considered an outlier based on these analyses and additional gene expression measurements and was not included in subsequent statistical analyses.

**Figure S3: Published NP marker expression in primary NP cells.** The gene networks depicted in Figure 3 were used to visualize expression levels of corresponding genes in primary NP cell isolates for either NP marker genes (A) or NP progenitor-associated genes (B). A) Selected NP cell marker gene network. Circle-size indicates an arbitrary log<sub>2</sub>-based expression value (*i.e.* based on fluorescence intensity on the micro-array); a log<sub>2</sub>-based expression value below 6.0 indicates low/absent gene expression (*i.e.* not expected to be biologically relevant). Colored lines in the network represent established biological connections between markers; parentheses: percentage representation. The highly expressed genes (*KRT18*, *FOXF1*) are among the best known NP cell marker genes. B) NP progenitor-associated gene network. Gene network showing log<sub>2</sub>-based expression values of the indicated genes in primary NP cells (*cf.* Figure 3B). Circle-size indicates an arbitrary log<sub>2</sub>-based expression value (*i.e.* based on fluorescence intensity on the micro-array). *VEGFA*, *ENO2*, *CD24*, *CD63*, *ITGB1*, *ITGAV* and *POU5F1* are strongly expressed by primary NP cells. Of note: expression of genes strongly linked to stem cells and NP progenitor cells is low/not detectable in primary isolates.

**Figure S4: Validation of membrane-associated NP and AF cellular heterogeneity markers.** A) rtPCR measurements for NP-R marker genes *LPPR4*, *CLDN11*, *PDGFRA*, and *RGMB* in four NP-R, NP-nR and AF clones under normal proliferation conditions. B) rtPCR measurements for NP-nR marker genes *PTPRF*, *SHISA2*, *PTGFRN* and *LRP5* in four NP-R, NP-nR and AF clones. C) rtPCR measurements for AF-S and AF-nS marker genes *NOTCH3*, *JAG1* and *HES1*. Gene selection was arbitrarily based on the fold expression difference and previous reports in literature. Correspondence of symbols to clone identity is indicated in the table (bottom right). Gene expression was normalized to

the housekeeper gene *Cyclophilin A*. Statistical significant differences are indicated by asterisks (two-tailed Student's *t*-test; p value <0.05).



## Supplemental Tables

|                                  |                                           |                                          |                                                    |
|----------------------------------|-------------------------------------------|------------------------------------------|----------------------------------------------------|
| <b>Species (ref#)</b>            | Rat (23)                                  | Canine (24)                              | Human (26)                                         |
| Methods                          | micro arrays                              | micro arrays                             | micro arrays                                       |
| Tissues                          | NP, AF, AC                                | NP, AF, AC                               | NP, AF                                             |
| <b>Markers validated (rtPCR)</b> |                                           |                                          |                                                    |
| NP positive (vs AC)              | <b><i>KRT19, PTN, GPC3, ANX3, VIM</i></b> | <u><i>KRT18, A2M, DSC2, NCAM1</i></u>    | <b><i>PAX1, FOXF1, CA12, HBB, OVOS2</i></b>        |
| NP positive (vs AF)              | <b><i>KRT19, GPC3, PTN, ANX3, VIM</i></b> |                                          |                                                    |
| IVD positive (vs AC)             |                                           |                                          |                                                    |
| NC positive (vs NP)              |                                           |                                          |                                                    |
| AC positive (vs NP)              | <b><i>COMP, MGP</i></b>                   | <b><i>MGP, COMP, PTN</i></b>             | <b><i>GDF10, CYTL, IBSP, FBLN1</i></b>             |
| AF positive (vs NP)              | <b><i>COMP</i></b>                        | <u><i>GPC3, COMP</i></u>                 |                                                    |
| AF & AC (vs NP)                  | <b><i>COMP</i></b>                        |                                          |                                                    |
| not a marker (AF vs NP)          |                                           |                                          |                                                    |
| not a marker (NP)                | <b><i>COMP</i></b>                        |                                          |                                                    |
| not a marker (IVD)               |                                           |                                          |                                                    |
| <b>Markers validated (IHC)</b>   | -                                         | on IVD tissue<br>A2M, NCAM1, DSC2, KRT18 | in differentiated MSCs<br>PAX1, FOXF1, IBSP, FBLN1 |

|                                  |                                                                        |                                        |                                         |
|----------------------------------|------------------------------------------------------------------------|----------------------------------------|-----------------------------------------|
| <b>Species (ref)</b>             | Bovine (25)                                                            | Human (30)                             | Human (27)                              |
| Methods                          | micro arrays                                                           | candidate approach                     | micro arrays                            |
| Tissues                          | NP, NC, AF, AC                                                         | NP, AF, AC                             | NP, AF, AC                              |
| <b>Markers validated (rtPCR)</b> |                                                                        |                                        |                                         |
| NP positive (vs AC)              | <b><i>KRT19, KRT18, VCAN, SNAP25, CDH2, SOSTDC1</i></b>                | <u><i>KRT18, KRT19, VIM, NCAM1</i></u> | <b><i>CA12, CLEC2B, SGCG, TYRO3</i></b> |
| NP positive (vs AF)              | <b><i>SNAP25, CDH2, SOSTDC1</i></b>                                    | <b><i>KRT19, NCAM1, A2M, DSC2</i></b>  |                                         |
| IVD positive (vs AC)             | <b><i>VCAN, TNMD, BASP1, TNFAIP6, FOXF1, FOXF2, AQP1</i></b>           |                                        |                                         |
| NC positive (vs NP)              | <b><i>T</i></b>                                                        |                                        |                                         |
| AC positive (vs NP)              |                                                                        | <b><i>COMP, MGP, PTN</i></b>           |                                         |
| AF positive (vs NP)              |                                                                        | <u><i>GPC3, COMP</i></u>               |                                         |
| AF & AC (vs NP)                  | <b><i>PTN</i></b>                                                      |                                        |                                         |
| not a marker (AF vs NP)          | <b><i>COL2A1, AGC, CD24</i></b>                                        |                                        |                                         |
| not a marker (NP)                | <u><i>IBSP, GPC3, ANX3, VIM, COMP, MGP, A2M, ANX4, DSC2, NCAM1</i></u> | <b><i>CD24</i></b>                     |                                         |
| not a marker (IVD)               | <b><i>FBLN1</i></b>                                                    |                                        |                                         |
| <b>Markers validated (IHC)</b>   | -                                                                      | on IVD tissue<br>KRT19, MGP            | on IVD tissue<br>CA12                   |

**Table S1: Overview of published NP, AF and AC markers.** Depicted are marker genes identified by whole transcriptome expression studies performed on freshly isolated cells, isolated from the indicated tissue and species. The genes indicated in bold showed consistent results while underlined genes did not under normal culturing or chondrogenic conditions. Interspecies variation is relatively high and certain

markers (e.a. *GPC3*, *MGP*, *PTN*) are not exclusively linked to one cell type in literature. #: Citations correspond to references in main article.

| <b>cf. Figure</b>       | <b>network<sup>A</sup></b> | <b>Gene markers</b>                                                                                                                                                                                                                                                                                                                                                                                 |
|-------------------------|----------------------------|-----------------------------------------------------------------------------------------------------------------------------------------------------------------------------------------------------------------------------------------------------------------------------------------------------------------------------------------------------------------------------------------------------|
| Figure 3A<br>Figure S3A | NP phenotype               | <i>CD49F</i> , <i>CD56 (NCAM1)</i> , <i>CD73 (NT5E)</i> , <i>CD90</i> , <i>CD105</i> , <i>CD166</i> , <i>KRT19</i> , <i>PTN</i> , <i>GPC3</i> , <i>ANXA3</i> , <i>VIM</i> , <i>KRT18</i> , <i>A2M</i> , <i>DSC2</i> , <i>PAX1</i> , <i>FOXF1</i> , <i>CA12</i> , <i>HBB</i> , <i>VCAN</i> , <i>SNAP25</i> , <i>CDH2</i> , <i>SOSTDC1</i> , <i>CLEC2B</i> , <i>SGCG</i> , <i>TYRO3</i>               |
| Figure 3B<br>Figure S3B | NP maturity                | <i>ALCAM</i> , <i>ANGPT1</i> , <i>CD24</i> , <i>CD63</i> , <i>ENG</i> , <i>ENO2</i> , <i>FLT1</i> , <i>GNL3</i> , <i>HSPB1</i> , <i>ITGAV</i> , <i>ITGB1</i> , <i>JAG1</i> , <i>KIT</i> , <i>NANOG</i> , <i>NGFR</i> , <i>NOTCH1</i> , <i>NT5E</i> , <i>PLCD4</i> , <i>POU5F1</i> , <i>PROM1</i> , <i>PTPRC</i> , <i>SHH</i> , <i>SNAI1</i> , <i>SOX2</i> , <i>TEK</i> , <i>THY1</i> , <i>VEGFA</i> |

**Table S2: Genes used for network building.**<sup>A</sup>: network generation in GenMania/Cytoscape.

| Gene          | ID <sup>A</sup> | FC <sup>B</sup> | p <sup>C</sup> | Gene description                                                        |
|---------------|-----------------|-----------------|----------------|-------------------------------------------------------------------------|
| <b>LPPR4</b>  | <b>9890</b>     | <b>12,2</b>     | <b>0,0001</b>  | <b>plasticity related gene 1</b>                                        |
| TRPV2         | 51393           | 11,3            | 0,0010         | transient receptor potential cation channel, subfamily V, member 2      |
| PCDH10        | 57575           | 10,2            | 0,0012         | protocadherin 10                                                        |
| MXRA8         | 54587           | 9,1             | 0,0001         | matrix-remodelling associated 8                                         |
| <b>PDGFRA</b> | <b>5156</b>     | <b>8,2</b>      | <b>0,0005</b>  | <b>platelet-derived growth factor receptor, alpha polypeptide</b>       |
| <b>CLDN11</b> | <b>5010</b>     | <b>6,9</b>      | <b>0,0113</b>  | <b>claudin 11 (oligodendrocyte transmembrane protein)</b>               |
| GPBR          | 2852            | 6,9             | 0,0019         | G protein-coupled receptor 30                                           |
| SCARA3        | 51435           | 6,8             | 0,0009         | scavenger receptor class A, member 3                                    |
| ELTD1         | 64123           | 6,1             | 0,0129         | EGF, latrophilin and seven transmembrane domain containing 1            |
| NLGN1         | 22871           | 6,0             | 0,0049         | neuroligin 1                                                            |
| <b>RGMB</b>   | <b>285704</b>   | <b>5,5</b>      | <b>0,0000</b>  | <b>RGM domain family, member B</b>                                      |
| TMEFF2        | 23671           | 5,5             | 0,0053         | transmembrane protein with EGF-like and two follistatin-like domains 2  |
| ADAM23        | 8745            | 5,0             | 0,0103         | a disintegrin and metalloproteinase domain 23                           |
| GYPC          | 2995            | 4,7             | 0,0015         | glycophorin C (Gerbich blood group)                                     |
| PERP          | 64065           | 4,5             | 0,0145         | PERP, TP53 apoptosis effector                                           |
| ADCY3         | 109             | 4,3             | 0,0001         | adenylate cyclase 3                                                     |
| TSPAN32       | 10077           | 4,3             | 0,0121         | pan-hematopoietic expression                                            |
| SLC16A5       | 9121            | 4,2             | 0,0011         | solute carrier family 16 (monocarboxylic acid transporters), member 5   |
| STEAP1        | 26872           | 4,2             | 0,0006         | six transmembrane epithelial antigen of the prostate 1                  |
| COLEC12       | 81035           | 4,2             | 0,0302         | collectin sub-family member 12                                          |
| FAM162B       | 221303          | 4,1             | 0,0049         | chromosome 6 open reading frame 189                                     |
| RSPO3         | 84870           | 4,1             | 0,0082         | thrombospondin, type I, domain containing 2                             |
| LPAR1         | 1902            | 3,9             | 0,0121         | Endothel. diff., lysophosphatidic acid G-protein-coupled receptor, 2    |
| KIAA1324L     | 222223          | 3,8             | 0,0006         | hypothetical protein FLJ31340                                           |
| KCNJ8         | 3764            | 3,7             | 0,0079         | K <sup>+</sup> inwardly-rectifying channel, subfamily J, member 8       |
| TMEM26        | 219623          | 3,6             | 0,0254         | transmembrane protein 26                                                |
| EPHA3         | 2042            | 3,6             | 0,0027         | EPH receptor A3                                                         |
| BDKRB1        | 623             | 3,5             | 0,0019         | bradykinin receptor B1                                                  |
| PCDH18        | 54510           | 3,4             | 0,0237         | protocadherin 18                                                        |
| ANPEP         | 290             | 3,3             | 0,0111         | alanine (membrane) aminopeptidase (N, M, microsomal, CD13, p150)        |
| TSPAN5        | 10098           | 3,3             | 0,0172         | transmembrane 4 superfamily member 9                                    |
| SLC17A9       | 63910           | 3,2             | 0,0003         | chromosome 20 open reading frame 59                                     |
| S1PR3         | 1903            | 3,2             | 0,0110         | endothelial differentiation, sphingolipid G-protein-coupled receptor, 3 |
| TNFRSF19      | 55504           | 3,2             | 0,0309         | tumor necrosis factor receptor superfamily, member 19                   |
| LPHN2         | 23266           | 3,1             | 0,0205         | latrophilin 2                                                           |
| VNN2          | 8875            | 3,1             | 0,0026         | vanin 2                                                                 |
| TMEM71        | 137835          | 3,1             | 0,0071         | hypothetical protein FLJ33069                                           |
| ITGA2         | 3673            | 3,0             | 0,0276         | integrin, alpha 2 (CD49B, alpha 2 subunit of VLA-2 receptor)            |
| LEPR          | 3953            | 3,0             | 0,0240         | leptin receptor                                                         |
| POPDC3        | 64208           | 3,0             | 0,0046         | popeye domain containing 3                                              |
| LRP11         | 84918           | 2,7             | 0,0025         | low density lipoprotein receptor-related protein 11                     |
| CA12          | 771             | 2,7             | 0,0254         | carbonic anhydrase XII                                                  |

|                 |        |     |        |                                                                  |
|-----------------|--------|-----|--------|------------------------------------------------------------------|
| <i>TSPAN10</i>  | 83882  | 2,7 | 0,0061 | oculospanin                                                      |
| <i>IL11RA</i>   | 3590   | 2,6 | 0,0012 | interleukin 11 receptor, alpha                                   |
| <i>CD68</i>     | 968    | 2,6 | 0,0036 | CD68 antigen                                                     |
| <i>MGC42105</i> | 167359 | 2,6 | 0,0060 | hypothetical protein MGC42105                                    |
| <i>NT5E</i>     | 4907   | 2,6 | 0,0289 | 5'-nucleotidase, ecto (CD73)                                     |
| <i>DSEL</i>     | 92126  | 2,5 | 0,0098 | chromosome 18 open reading frame 4                               |
| <i>ITM2C</i>    | 81618  | 2,5 | 0,0025 | integral membrane protein 2C                                     |
| <i>ANXA2</i>    | 302    | 2,5 | 0,0086 | annexin A2                                                       |
| <i>ITGA6</i>    | 3655   | 2,5 | 0,0052 | integrin, alpha 6                                                |
| <i>PQLC3</i>    | 130814 | 2,5 | 0,0043 | chromosome 2 open reading frame 22                               |
| <i>SSFA2</i>    | 6744   | 2,4 | 0,0156 | sperm specific antigen 2                                         |
| <i>SCN2A</i>    | 6326   | 2,4 | 0,0333 | Na <sup>+</sup> channel, voltage-gated, type II, alpha 2         |
| <i>ANTXR2</i>   | 118429 | 2,4 | 0,0146 | anthrax toxin receptor 2                                         |
| <i>FAM176B</i>  | 55194  | 2,3 | 0,0225 | hypothetical protein FLJ10647                                    |
| <i>NINJ2</i>    | 4815   | 2,3 | 0,0442 | ninjurin 2                                                       |
| <i>FDFT1</i>    | 2222   | 2,3 | 0,0016 | farnesyl-diphosphate farnesyltransferase 1                       |
| <i>SLC9A9</i>   | 285195 | 2,3 | 0,0187 | solute carrier family 9 (sodium/hydrogen exchanger), isoform 9   |
| <i>GPR162</i>   | 27239  | 2,3 | 0,0177 | gene rich cluster, A gene                                        |
| <i>FAM176A</i>  | 84141  | 2,3 | 0,0042 | hypothetical protein FLJ13391                                    |
| <i>MERTK</i>    | 10461  | 2,3 | 0,0366 | c-mer proto-oncogene tyrosine kinase                             |
| <i>GSG1</i>     | 83445  | 2,2 | 0,0072 | germ cell associated 1                                           |
| <i>STEAP3</i>   | 55240  | 2,2 | 0,0099 | dudulin 2                                                        |
| <i>CLEC2B</i>   | 9976   | 2,2 | 0,0412 | C-type lectin domain family 2, member B                          |
| <i>TMEM38B</i>  | 55151  | 2,2 | 0,0172 | transmembrane protein 38B                                        |
| <i>CD44</i>     | 960    | 2,2 | 0,0422 | CD44 antigen (homing function and Indian blood group system)     |
| <i>F2RL1</i>    | 2150   | 2,1 | 0,0309 | coagulation factor II (thrombin) receptor-like 1                 |
| <i>EVI2B</i>    | 2124   | 2,1 | 0,0128 | ecotropic viral integration site 2B                              |
| <i>TSPAN4</i>   | 7106   | 2,1 | 0,0265 | transmembrane 4 superfamily member 7                             |
| <i>SLCO3A1</i>  | 28232  | 2,1 | 0,0218 | solute carrier organic anion transporter family, member 3A1      |
| <i>IL1R1</i>    | 3554   | 2,1 | 0,0189 | interleukin 1 receptor, type I                                   |
| <i>VAT1</i>     | 10493  | 2,1 | 0,0196 | vesicle amine transport protein 1 homolog (T californica)        |
| <i>DCHS1</i>    | 8642   | 2,1 | 0,0321 | dachsous 1 (Drosophila)                                          |
| <i>LRRC8C</i>   | 84230  | 2,1 | 0,0206 | factor for adipocyte differentiation 158                         |
| <i>KIAA1715</i> | 80856  | 2,1 | 0,0018 | KIAA1715                                                         |
| <i>C2orf28</i>  | 51374  | 2,1 | 0,0019 | chromosome 2 open reading frame 28                               |
| <i>LY6K</i>     | 54742  | 2,0 | 0,0079 | lymphocyte antigen 6 complex, locus K                            |
| <i>LRFN5</i>    | 145581 | 2,0 | 0,0160 | leucine rich repeat and fibronectin type III domain containing 5 |

**Table S3: NP-R marker genes (compared to NP-nR).** <sup>A</sup>: ENTREZ Gene ID; <sup>B</sup>: Fold Change (NP-R/NP-nR); <sup>C</sup>: adjusted p value.

| Gene          | ID <sup>A</sup> | FC <sup>B</sup> | p <sup>C</sup> | Gene description                                                                |
|---------------|-----------------|-----------------|----------------|---------------------------------------------------------------------------------|
| <b>PTPRF</b>  | <b>5792</b>     | <b>-22,5</b>    | <b>0,0001</b>  | <b>protein tyrosine phosphatase, receptor type, F</b>                           |
| CD70          | 970             | -20,3           | 0,0006         | tumor necrosis factor (ligand) superfamily, member 7                            |
| <b>SHISA2</b> | <b>387914</b>   | <b>-18,9</b>    | <b>0,0000</b>  | <b>chromosome 13 open reading frame 13</b>                                      |
| GPRC5C        | 55890           | -17,4           | 0,0001         | G protein-coupled receptor, family C, group 5, member C                         |
| CXCR7         | 57007           | -13,7           | 0,0004         | chemokine orphan receptor 1                                                     |
| <b>PTGFRN</b> | <b>5738</b>     | <b>-11,4</b>    | <b>0,0000</b>  | <b>prostaglandin F2 receptor negative regulator</b>                             |
| CHST15        | 51363           | -8,7            | 0,0053         | B cell RAG associated protein                                                   |
| VLDLR         | 7436            | -8,1            | 0,0005         | very low density lipoprotein receptor                                           |
| HEPH          | 9843            | -6,0            | 0,0013         | hephaestin                                                                      |
| PDPN          | 10630           | -5,9            | 0,0057         | lung type-I cell membrane-associated glycoprotein                               |
| DLL3          | 10683           | -5,8            | 0,0003         | delta-like 3 (Drosophila)                                                       |
| CDH6          | 1004            | -5,6            | 0,0005         | cadherin 6, type 2, K-cadherin (fetal kidney)                                   |
| SLC6A9        | 6536            | -5,5            | 0,0001         | solute carrier family 6 (neurotransmitter transporter, glycine), member 9       |
| PLD6          | 201164          | -5,5            | 0,0012         | similar to CG12314 gene product                                                 |
| <b>LRP5</b>   | <b>4041</b>     | <b>-5,1</b>     | <b>0,0001</b>  | <b>low density lipoprotein receptor-related protein 5</b>                       |
| EFNB3         | 1949            | -4,8            | 0,0333         | ephrin-B3                                                                       |
| SLC2A1        | 6513            | -4,6            | 0,0224         | solute carrier family 2 (facilitated glucose transporter), member 1             |
| PTPRE         | 5791            | -4,5            | 0,0008         | protein tyrosine phosphatase, receptor type, E                                  |
| CDH13         | 1012            | -4,1            | 0,0019         | cadherin 13, H-cadherin (heart)                                                 |
| BST1          | 683             | -4,0            | 0,0430         | bone marrow stromal cell antigen 1                                              |
| PLXDC2        | 84898           | -3,9            | 0,0391         | plexin domain containing 2                                                      |
| CLDN1         | 9076            | -3,8            | 0,0411         | claudin 1                                                                       |
| NETO2         | 81831           | -3,6            | 0,0022         | neuropilin (NRP) and tolloid (TLL)-like 2                                       |
| ROR1          | 4919            | -3,6            | 0,0099         | receptor tyrosine kinase-like orphan receptor 1                                 |
| PMEPA1        | 56937           | -3,5            | 0,0385         | transmembrane, prostate androgen induced RNA                                    |
| ITGA11        | 22801           | -3,4            | 0,0471         | integrin, alpha 11                                                              |
| SLC38A1       | 81539           | -3,4            | 0,0010         | solute carrier family 38, member 1                                              |
| APCDD1L       | 164284          | -3,4            | 0,0470         | hypothetical protein FLJ90166                                                   |
| TSPAN13       | 27075           | -3,2            | 0,0256         | transmembrane 4 superfamily member 13                                           |
| EFNA1         | 1942            | -3,2            | 0,0034         | ephrin-A1                                                                       |
| THY1          | 7070            | -3,2            | 0,0347         | Thy-1 cell surface antigen                                                      |
| SUSD3         | 203328          | -3,1            | 0,0188         | sushi domain containing 3                                                       |
| SLC7A5        | 8140            | -2,9            | 0,0008         | solute carrier family 7 (cation.aminoacid transporter, y+ system), member 5     |
| ABCA3         | 21              | -2,8            | 0,0172         | ATP-binding cassette, sub-family A (ABC1), member 3                             |
| TNFSF9        | 8744            | -2,8            | 0,0196         | tumor necrosis factor (ligand) superfamily, member 9                            |
| GRAMD3        | 65983           | -2,8            | 0,0005         | HCV NS3-transactivated protein 2                                                |
| CELSR2        | 1952            | -2,7            | 0,0015         | cadherin, EGF LAG seven-pass G-type receptor 2 (flamingo homolog <i>D.mel</i> ) |
| PVR           | 5817            | -2,7            | 0,0012         | poliovirus receptor                                                             |
| IL27RA        | 9466            | -2,7            | 0,0049         | interleukin 27 receptor, alpha                                                  |
| PRUNE2        | 158471          | -2,6            | 0,0080         | KIAA0367                                                                        |
| NPDC1         | 56654           | -2,6            | 0,0249         | neural proliferation, differentiation and control, 1                            |
| MAMDC4        | 158056          | -2,5            | 0,0008         | apical early endosomal glycoprotein precursor                                   |

|                 |        |      |        |                                                                              |
|-----------------|--------|------|--------|------------------------------------------------------------------------------|
| <i>OXTR</i>     | 5021   | -2,5 | 0,0031 | oxytocin receptor                                                            |
| <i>NTM</i>      | 50863  | -2,5 | 0,0129 | Neurotrimin                                                                  |
| <i>MUC1</i>     | 4582   | -2,5 | 0,0277 | mucin 1, transmembrane                                                       |
| <i>C4orf49</i>  | 84709  | -2,5 | 0,0110 | ovary-specific acidic protein                                                |
| <i>PROM1</i>    | 8842   | -2,5 | 0,0214 | prominin 1                                                                   |
| <i>SDC2</i>     | 6383   | -2,5 | 0,0148 | syndecan 2 (heparan sulfate proteoglycan 1, cell surface-assoc. fibroglycan) |
| <i>CTXN1</i>    | 404217 | -2,4 | 0,0153 | cortexin 1                                                                   |
| <i>ENPP4</i>    | 22875  | -2,4 | 0,0342 | ectonucleotide pyrophosphatase/phosphodiesterase 4                           |
| <i>CMTM8</i>    | 152189 | -2,4 | 0,0208 | chemokine-like factor super family 8                                         |
| <i>CMTM7</i>    | 112616 | -2,3 | 0,0216 | chemokine-like factor super family 7                                         |
| <i>PLXNB1</i>   | 5364   | -2,3 | 0,0042 | plexin B1                                                                    |
| <i>ACCN2</i>    | 41     | -2,3 | 0,0484 | amiloride-sensitive cation channel 2, neuronal                               |
| <i>RHBDF2</i>   | 79651  | -2,3 | 0,0281 | rhomboid, veinlet-like 6 (Drosophila)                                        |
| <i>SLC2A6</i>   | 11182  | -2,3 | 0,0148 | solute carrier family 2 (facilitated glucose transporter), member 6          |
| <i>GDPD5</i>    | 81544  | -2,3 | 0,0314 | hypothetical protein PP1665                                                  |
| <i>P2RY11</i>   | 5032   | -2,3 | 0,0430 | purinergic receptor P2Y, G-protein coupled, 11                               |
| <i>REEP2</i>    | 51308  | -2,3 | 0,0197 | chromosome 5 open reading frame 19                                           |
| <i>C14orf37</i> | 145407 | -2,3 | 0,0120 | chromosome 14 open reading frame 37                                          |
| <i>SIRPA</i>    | 140885 | -2,3 | 0,0117 | protein tyrosine phosphatase, non-receptor type substrate 1                  |
| <i>ADAM12</i>   | 8038   | -2,2 | 0,0052 | a disintegrin and metalloproteinase domain 12 (meltrin alpha)                |
| <i>C11orf75</i> | 56935  | -2,2 | 0,0154 | FN5 protein                                                                  |
| <i>F2R</i>      | 2149   | -2,2 | 0,0030 | coagulation factor II (thrombin) receptor                                    |
| <i>SLC26A6</i>  | 65010  | -2,2 | 0,0058 | solute carrier family 26, member 6                                           |
| <i>KIAA1324</i> | 57535  | -2,2 | 0,0159 | maba1                                                                        |
| <i>TMEM56</i>   | 148534 | -2,2 | 0,0037 | hypothetical protein FLJ31842                                                |
| <i>TGFA</i>     | 7039   | -2,1 | 0,0189 | transforming growth factor, alpha                                            |
| <i>GPC2</i>     | 221914 | -2,1 | 0,0149 | glypican 2 (cerebroglycan)                                                   |
| <i>TMEM39A</i>  | 55254  | -2,1 | 0,0103 | transmembrane protein 39A                                                    |
| <i>FZD9</i>     | 8326   | -2,1 | 0,0482 | frizzled homolog 9 (Drosophila)                                              |
| <i>HBEGF</i>    | 1839   | -2,1 | 0,0385 | heparin-binding EGF-like growth factor                                       |
| <i>FAIM3</i>    | 9214   | -2,1 | 0,0141 | regulator of Fas-induced apoptosis                                           |
| <i>CD200</i>    | 4345   | -2,1 | 0,0479 | CD200 antigen                                                                |
| <i>RRP12</i>    | 23223  | -2,1 | 0,0183 | KIAA0690                                                                     |
| <i>FIBCD1</i>   | 84929  | -2,0 | 0,0319 | fibrinogen C domain containing 1                                             |
| <i>IFRD1</i>    | 3475   | -2,0 | 0,0053 | interferon-related developmental regulator 1                                 |
| <i>CHRNA5</i>   | 1138   | -2,0 | 0,0237 | cholinergic receptor, nicotinic, alpha polypeptide 5                         |
| <i>SLC1A4</i>   | 6509   | -2,0 | 0,0480 | solute carrier family 1 (glutamate/neutral amino acid transporter) member 4  |
| <i>HPN</i>      | 3249   | -2,0 | 0,0262 | hepsin (transmembrane protease, serine 1)                                    |
| <i>CACNA1C</i>  | 775    | -2,0 | 0,0421 | Ca <sup>2+</sup> channel, voltage-dependent, L type, alpha 1C subunit        |
| <i>IL1RAP</i>   | 3556   | -2,0 | 0,0237 | interleukin 1 receptor accessory protein                                     |

**Table S4: NP-nR marker genes (compared to NP-R).** <sup>A</sup>: ENTREZ Gene ID; <sup>B</sup>: Fold Change (NP-R/NP-nR); <sup>C</sup>: adjusted p value.

| Gene          | ID <sup>A</sup> | FC <sup>B</sup> | p <sup>C</sup> | Gene description                                                                                 |
|---------------|-----------------|-----------------|----------------|--------------------------------------------------------------------------------------------------|
| <b>NOTCH3</b> | <b>4854</b>     | <b>4,8</b>      | <b>0,0010</b>  | <b>notch 3</b>                                                                                   |
| KCNG1         | 3755            | 4,4             | 0,0002         | K <sup>+</sup> voltage-gated channel, subfamily G, member 1                                      |
| CD14          | 929             | 3,6             | 0,0017         | CD14 molecule                                                                                    |
| <b>JAG1</b>   | <b>182</b>      | <b>3,5</b>      | <b>0,0000</b>  | <b>jagged 1</b>                                                                                  |
| HAS1          | 3036            | 3,2             | 0,0047         | hyaluronan synthase 1                                                                            |
| KCNMB1        | 3779            | 3,2             | 0,0035         | K <sup>+</sup> large conductance Ca <sup>2+</sup> -activated channel, subfamily M, beta member 1 |
| GHSR          | 2693            | 3,0             | 0,0000         | growth hormone secretagogue receptor                                                             |
| SLC26A7       | 115111          | 2,7             | 0,0028         | solute carrier family 26, member 7                                                               |
| P2RY2         | 5029            | 2,7             | 0,0148         | purinergic receptor P2Y, G-protein coupled, 2                                                    |
| CADM3         | 57863           | 2,6             | 0,0178         | cell adhesion molecule 3                                                                         |
| GPM6B         | 2824            | 2,5             | 0,0007         | glycoprotein M6B                                                                                 |
| NPR3          | 4883            | 2,5             | 0,0244         | (atrio)natriuretic peptide receptor C/guanylate cyclase C                                        |
| DYSF          | 8291            | 2,5             | 0,0333         | dysferlin, limb girdle muscular dystrophy 2B (autosomal recessive)                               |
| PMEDA1        | 56937           | 2,5             | 0,0071         | prostate transmembrane protein, androgen induced 1                                               |
| SUSD2         | 56241           | 2,5             | 0,0002         | sushi domain containing 2                                                                        |
| LRRC25        | 126364          | 2,5             | 0,0204         | leucine rich repeat containing 25                                                                |
| GPR124        | 25960           | 2,5             | 0,0263         | G protein-coupled receptor 124                                                                   |
| ITGA11        | 22801           | 2,4             | 0,0198         | integrin, alpha 11                                                                               |
| TTYH2         | 94015           | 2,4             | 0,0394         | tweety homolog 2 (Drosophila)                                                                    |
| KCNK17        | 89822           | 2,3             | 0,0037         | K <sup>+</sup> channel, subfamily K, member 17                                                   |
| LRRC32        | 2615            | 2,3             | 0,0335         | leucine rich repeat containing 32                                                                |
| GPR115        | 221393          | 2,3             | 0,0006         | G protein-coupled receptor 115                                                                   |
| EFNB1         | 1947            | 2,3             | 0,0044         | ephrin-B1                                                                                        |
| CHIC1         | 53344           | 2,3             | 0,0017         | cysteine-rich hydrophobic domain 1                                                               |
| THSD7B        | 80731           | 2,2             | 0,0012         | thrombospondin, type I, domain containing 7B                                                     |
| ATP2B2        | 491             | 2,2             | 0,0089         | ATPase, Ca <sup>++</sup> transporting, plasma membrane 2                                         |
| ITPR1L2       | 162073          | 2,2             | 0,0006         | inositol 1,4,5-trisphosphate receptor interacting protein-like 2                                 |
| ABCA10        | 10349           | 2,2             | 0,0116         | ATP-binding cassette, sub-family A (ABC1), member 10                                             |
| C3orf35       | 339883          | 2,2             | 0,0024         | chromosome 3 open reading frame 35                                                               |
| SLC43A1       | 8501            | 2,2             | 0,0014         | solute carrier family 43, member 1                                                               |
| ZP4           | 57829           | 2,2             | 0,0438         | zona pellucida glycoprotein 4                                                                    |
| CD6           | 923             | 2,2             | 0,0019         | CD6 molecule                                                                                     |
| PKHD1         | 5314            | 2,2             | 0,0233         | polycystic kidney and hepatic disease 1 (autosomal recessive)                                    |
| CDHR5         | 53841           | 2,2             | 0,0014         | cadherin-related family member 5                                                                 |
| SLC27A6       | 28965           | 2,2             | 0,0176         | solute carrier family 27 (fatty acid transporter), member 6                                      |
| OR52J3        | 119679          | 2,1             | 0,0021         | olfactory receptor, family 52, subfamily J, member 3                                             |
| SLC29A4       | 222962          | 2,1             | 0,0052         | solute carrier family 29 (nucleoside transporters), member 4                                     |
| SLCO2B1       | 11309           | 2,1             | 0,0185         | solute carrier organic anion transporter family, member 2B1                                      |
| CTAGE1        | 64693           | 2,1             | 0,0110         | cutaneous T-cell lymphoma-associated antigen 1                                                   |
| ALPL          | 249             | 2,1             | 0,0300         | alkaline phosphatase, liver/bone/kidney                                                          |
| FAP           | 2191            | 2,1             | 0,0129         | fibroblast activation protein, alpha                                                             |
| SPNS3         | 201305          | 2,1             | 0,0040         | spinster homolog 3 (Drosophila)                                                                  |



|                  |        |     |        |                                                                                                                                             |
|------------------|--------|-----|--------|---------------------------------------------------------------------------------------------------------------------------------------------|
| <i>FOLH1</i>     | 2346   | 2,1 | 0,0075 | folate hydrolase (prostate-specific membrane antigen) 1                                                                                     |
| <i>CDH26</i>     | 60437  | 2,1 | 0,0208 | cadherin 26                                                                                                                                 |
| <i>LST1</i>      | 7940   | 2,1 | 0,0024 | leukocyte specific transcript 1                                                                                                             |
| <i>KCNN3</i>     | 3782   | 2,1 | 0,0025 | K <sup>+</sup> intermediate/small conductance Ca <sup>2+</sup> -activated channel, subfam N, mbr 3                                          |
| <i>SUCO</i>      | 51430  | 2,1 | 0,0295 | SUN domain containing ossification factor                                                                                                   |
| <i>LGR6</i>      | 59352  | 2,1 | 0,0111 | leucine-rich repeat containing G protein-coupled receptor 6                                                                                 |
| <i>SLCO1A2</i>   | 6579   | 2,1 | 0,0062 | solute carrier organic anion transporter family, member 1A2                                                                                 |
| <i>SEMA5B</i>    | 54437  | 2,1 | 0,0049 | sema domain, seven thrombospondin repeats (type 1 and type 1-like), transmembrane domain (TM) and short cytoplasmic domain, (semaphorin) 5B |
| <i>PTCHD4</i>    | 442213 | 2,1 | 0,0165 | patched domain containing 4                                                                                                                 |
| <i>CMTM1</i>     | 113540 | 2,1 | 0,0322 | CKLF-like MARVEL transmembrane domain containing 1                                                                                          |
| <i>CNGA4</i>     | 1262   | 2,0 | 0,0168 | cyclic nucleotide gated channel alpha 4                                                                                                     |
| <i>LINC00340</i> | 401237 | 2,0 | 0,0097 | long intergenic non-protein coding RNA 340                                                                                                  |
| <i>PCDHGA1</i>   | 56114  | 2,0 | 0,0102 | protocadherin gamma subfamily A, 1                                                                                                          |
| <i>OPN1MW</i>    | 2652   | 2,0 | 0,0409 | opsin 1 (cone pigments), medium-wave-sensitive                                                                                              |
| <i>KIR2DL1</i>   | 3802   | 2,0 | 0,0451 | killer cell immunoglobulin-like receptor, two domains, long cytoplasmic tail, 1                                                             |
| <i>GJA5</i>      | 2702   | 2,0 | 0,0445 | gap junction protein, alpha 5, 40kDa                                                                                                        |

**Table S5: AF-nS marker genes (compared to AF-S).** <sup>A</sup>: ENTREZ Gene ID; <sup>B</sup>: Fold Change (AF-nS/AF-S); <sup>C</sup>: adjusted p value.

| Gene                 | ID <sup>A</sup> | FC <sup>B</sup> | p <sup>C</sup> | Gene description                                                                                  |
|----------------------|-----------------|-----------------|----------------|---------------------------------------------------------------------------------------------------|
| <i>CD24</i>          | 10013394<br>1   | -7,9            | 0,0085         | CD24 molecule                                                                                     |
| <i>HAS3</i>          | 3038            | -4,8            | 0,0177         | hyaluronan synthase 3                                                                             |
| <b><i>CLDN11</i></b> | <b>5010</b>     | <b>-3,5</b>     | <b>0,0014</b>  | <b>claudin 11</b>                                                                                 |
| <i>GPRC5A</i>        | 9052            | -3,3            | 0,0003         | G protein-coupled receptor, family C, group 5, member A                                           |
| <i>C1QTNF3</i>       | 114899          | -3,3            | 0,0073         | C1q and tumor necrosis factor related protein 3                                                   |
| <i>TMEM158</i>       | 25907           | -3,1            | 0,0052         | transmembrane protein 158 (gene/pseudogene)                                                       |
| <i>PERP</i>          | 64065           | -3,0            | 0,0009         | PERP, TP53 apoptosis effector                                                                     |
| <i>GPER</i>          | 2852            | -3,0            | 0,0019         | G protein-coupled estrogen receptor 1                                                             |
| <i>SLCO5A1</i>       | 81796           | -3,0            | 0,0029         | solute carrier organic anion transporter family, member 5A1                                       |
| <i>GPR26</i>         | 2849            | -2,7            | 0,0324         | G protein-coupled receptor 26                                                                     |
| <i>CD36</i>          | 948             | -2,6            | 0,0022         | CD36 molecule (thrombospondin receptor)                                                           |
| <i>CLDN1</i>         | 9076            | -2,5            | 0,0234         | claudin 1                                                                                         |
| <i>GABRA1</i>        | 2554            | -2,5            | 0,0017         | gamma-aminobutyric acid (GABA) A receptor, alpha 1                                                |
| <i>LOC44029</i><br>2 | 440292          | -2,5            | 0,0002         | uncharacterized LOC440292                                                                         |
| <i>OR51A2</i>        | 401667          | -2,5            | 0,0232         | olfactory receptor, family 51, subfamily A, member 2                                              |
| <i>MSLN</i>          | 10232           | -2,5            | 0,0095         | mesothelin                                                                                        |
| <i>LRIT2</i>         | 340745          | -2,5            | 0,0183         | leucine-rich repeat, immunoglobulin-like and transmembrane domains 2                              |
| <i>APCDD1L</i>       | 164284          | -2,4            | 0,0131         | adenomatosis polyposis coli down-regulated 1-like                                                 |
| <i>CNIH3</i>         | 149111          | -2,4            | 0,0103         | cornichon homolog 3 (Drosophila)                                                                  |
| <i>DLK2</i>          | 65989           | -2,3            | 0,0245         | delta-like 2 homolog (Drosophila)                                                                 |
| <i>SUN5</i>          | 140732          | -2,3            | 0,0030         | Sad1 and UNC84 domain containing 5                                                                |
| <i>MAL</i>           | 4118            | -2,3            | 0,0302         | mal, T-cell differentiation protein                                                               |
| <i>COLEC12</i>       | 81035           | -2,3            | 0,0432         | collectin sub-family member 12                                                                    |
| <i>SYNPR</i>         | 132204          | -2,2            | 0,0315         | synaptoporin                                                                                      |
| <i>TMEFF2</i>        | 23671           | -2,2            | 0,0224         | transmembrane protein with EGF-like and two follistatin-like domains 2                            |
| <i>SCN9A</i>         | 6335            | -2,2            | 0,0243         | Na <sup>+</sup> channel, voltage-gated, type IX, alpha subunit                                    |
| <i>GJA8</i>          | 2703            | -2,2            | 0,0069         | gap junction protein, alpha 8, 50kDa                                                              |
| <i>KCNMA1</i>        | 3778            | -2,2            | 0,0049         | K <sup>+</sup> large conductance Ca <sup>2+</sup> -activated channel, subfamily M, alpha member 1 |
| <i>C10orf111</i>     | 221060          | -2,1            | 0,0145         | chromosome 10 open reading frame 111                                                              |
| <i>OR5M11</i>        | 219487          | -2,1            | 0,0110         | olfactory receptor, family 5, subfamily M, member 11                                              |
| <i>KLRG1</i>         | 10219           | -2,1            | 0,0032         | killer cell lectin-like receptor subfamily G, member 1                                            |
| <i>KCNS3</i>         | 3790            | -2,1            | 0,0291         | K <sup>+</sup> voltage-gated channel, delayed-rectifier, subfamily S, member 3                    |
| <i>LPAR1</i>         | 1902            | -2,0            | 0,0232         | lysophosphatidic acid receptor 1                                                                  |
| <i>SYT13</i>         | 57586           | -2,0            | 0,0075         | synaptotagmin XIII                                                                                |

**Table S6: AF-S marker genes (compared to AF-nS).** <sup>A</sup>: ENTREZ Gene ID; <sup>B</sup>: Fold Change (AF-nS/AF-S); <sup>C</sup>: adjusted p value.

| <b>Gene</b>    | <b>Gene name</b>                                   | <b>Forward primer</b>    | <b>Reverse primer</b>    |
|----------------|----------------------------------------------------|--------------------------|--------------------------|
| <i>CA12</i>    | Carbonic anhydrase XII                             | AAAGGCCAGGAAGCATTTCGT    | CCCCGGTAGCGGTAATATTCA    |
| <i>CD24</i>    | CD24 Antigen                                       | CCACGCAGATTTATTCCAGTGA   | GCCAACCCAGAGTTGGAAGTAC   |
| <i>CLDN11</i>  | Claudin-11                                         | TGGCTGGTGTTTTGCTCATT     | CGCACACAGGGAACCAGAT      |
| <i>COL12A1</i> | Collagen type XII, collagen $\alpha$ 1             | TGACAACCCCTTCCGACACA     | CTCCTCACGGTTCTAAAATTTGC  |
| <i>FOXF1</i>   | Forhead box F1                                     | CCCACACAGGAATTCTGCTGA    | TCCCCCACTTCTGCCATT       |
| <i>HES1</i>    | hairy and enhancer of split-1                      | AGGCGGACATTCTGGAATG      | CGGTACTTCCCCAGCACACTT    |
| <i>JAG1</i>    | Jagged 1                                           | CCGGCGTGCTGGGTAGAG       | CGGCCGAGGTAACACAAT       |
| <i>LPPR4</i>   | Lipid phosphate phosphatase-related 4              | TGGTAGCAGCAGTGATGGAATT   | GAGCTAGCATCTCTGTGGTTTTCG |
| <i>LRP5</i>    | Low density lipoprotein receptor-related protein 5 | AACATCAAGCGAGCCAAGGA     | CGGCTGTAGATGTCGATGCT     |
| <i>NOTCH3</i>  | Notch homolog 3 (Drosophila)                       | TCTCAGACTGGTCCGAATCCAC   | ACACTTGCCTCTTGGGGTAAC    |
| <i>PDGFRA</i>  | Platelet-derived growth factor receptor, alpha     | CTTATTGTCCTGGTTGTCATTTGG | CAATGACCCTCCAGCGAATT     |
| <i>PTGFRN</i>  | Prostaglandin F2 receptor negative regulator       | GTTCAACCCCCAGCACAGAT     | CTTTAACCTGCACTGTGTCCTCAT |
| <i>PTPRF</i>   | Receptor-type tyrosine-protein phosphatase F       | CCGACCTGGCGGACAAC        | GTTTGAATTCTCCACGTGAACT   |
| <i>RGMB</i>    | RGM domain family, member B                        | CCAACAGCCAGCCCAATG       | TGAGAAGTCAGGGACACGAAGTC  |
| <i>SFRP2</i>   | Secreted frizzled-related protein 2                | TGTGCCACGGCATCGA         | TCGTGGCCCAGCAGGTT        |
| <i>SHISA2</i>  | Shisa Homolog 2 (Xenopus Laevis)                   | CGTGCCGTTCTCATTGTT       | CCAGGGACCCCAAGATGATA     |
| <i>PPIA</i>    | Cyclophilin A                                      | CCTGCTTCCACCGGATCAT      | CGTTGTGGCGCGTAAAGTC      |

**Table S7: qPCR primer sequences**
